# Supplementary material
Source: PubMed Central journal article supplement (PMC1257705)
Supplement: pnas_0504981102_2.pdf [file pnas_0504981102_2.pdf]

**A**

HP1

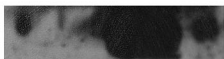

HOAP

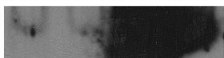

1 2 3 4

**B**

97-

66-

45-

31-

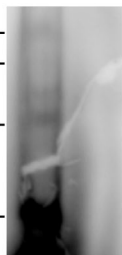

&lt;HOAP

&lt;HP1

1 2

**C** $^{32}\text{P}$ -labeled Proteins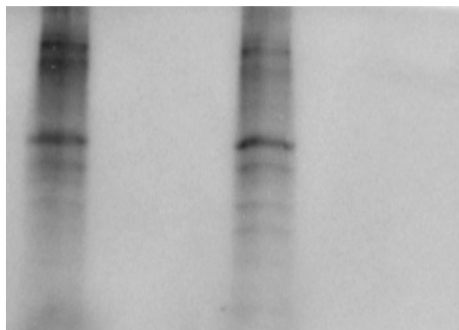HOAP  
immunoblot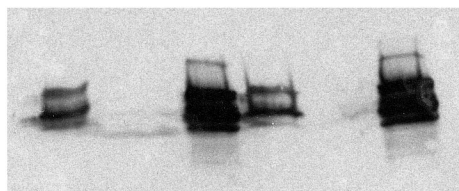

| In          | S | P | In      | S | P |
|-------------|---|---|---------|---|---|
| 0-3 hr      |   |   | 3-15 hr |   |   |
| cytoplasmic |   |   | nuclear |   |   |
